# Supplementary material for: Spatial Heterogeneity and Temporal Trends in Malaria on the Thai–Myanmar Border (2012–2017): A Retrospective Observational Study
Source: MDPI journal article supplement (doi:10.3390/tropicalmed4020062), 2019-04-12
Supplement: s1 [file s1]

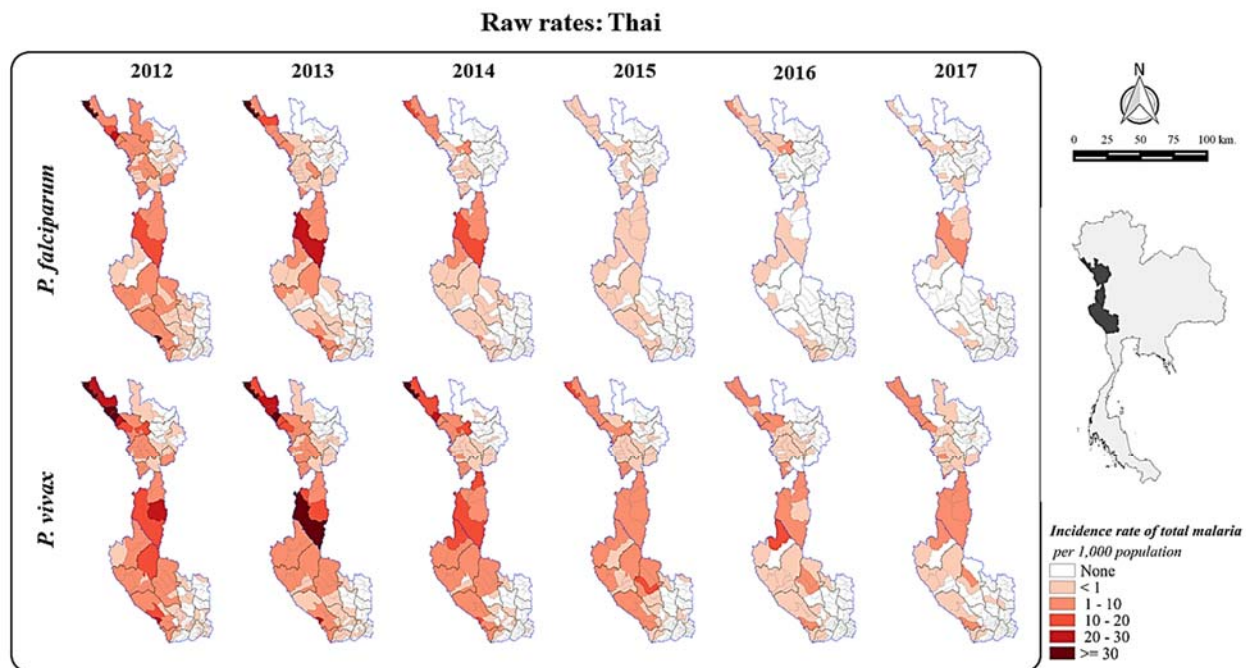

**Figure S1** Raw rates map of *P. falciparum* and *P. vivax* among Thai citizens

**Table S1** Number of sub-district in each interval of *P. falciparum* and *P. vivax* incidence rates per 1,000 population per year by raw rates

| Incidence rates      | 2012 | 2013 | 2014 | 2015 | 2016 | 2017 |
|----------------------|------|------|------|------|------|------|
| <i>P. falciparum</i> |      |      |      |      |      |      |
| 0                    | 77   | 94   | 115  | 125  | 137  | 145  |
| < 1                  | 41   | 42   | 32   | 36   | 22   | 15   |
| 1 - 10               | 38   | 21   | 12   | 0    | 2    | 1    |
| 10 - 20              | 2    | 2    | 2    | 0    | 0    | 0    |
| 20 - 30              | 1    | 1    | 0    | 0    | 0    | 0    |
| ≥ 30                 | 2    | 1    | 0    | 0    | 0    | 0    |
| <i>P. vivax</i>      |      |      |      |      |      |      |
| 0                    | 66   | 72   | 92   | 90   | 102  | 111  |
| < 1                  | 46   | 43   | 27   | 37   | 40   | 31   |
| 1 - 10               | 35   | 35   | 32   | 32   | 18   | 19   |
| 10 - 20              | 6    | 5    | 8    | 2    | 1    | 0    |
| 20 - 30              | 5    | 3    | 1    | 0    | 0    | 0    |
| ≥ 30                 | 3    | 3    | 1    | 0    | 0    | 0    |
