# Supplementary material for: Spatial Heterogeneity and Temporal Trends in Malaria on the Thai–Myanmar Border (2012–2017): A Retrospective Observational Study
Source: MDPI journal article supplement (doi:10.3390/tropicalmed4020062), 2019-04-12
Supplement: s1 [file s1]

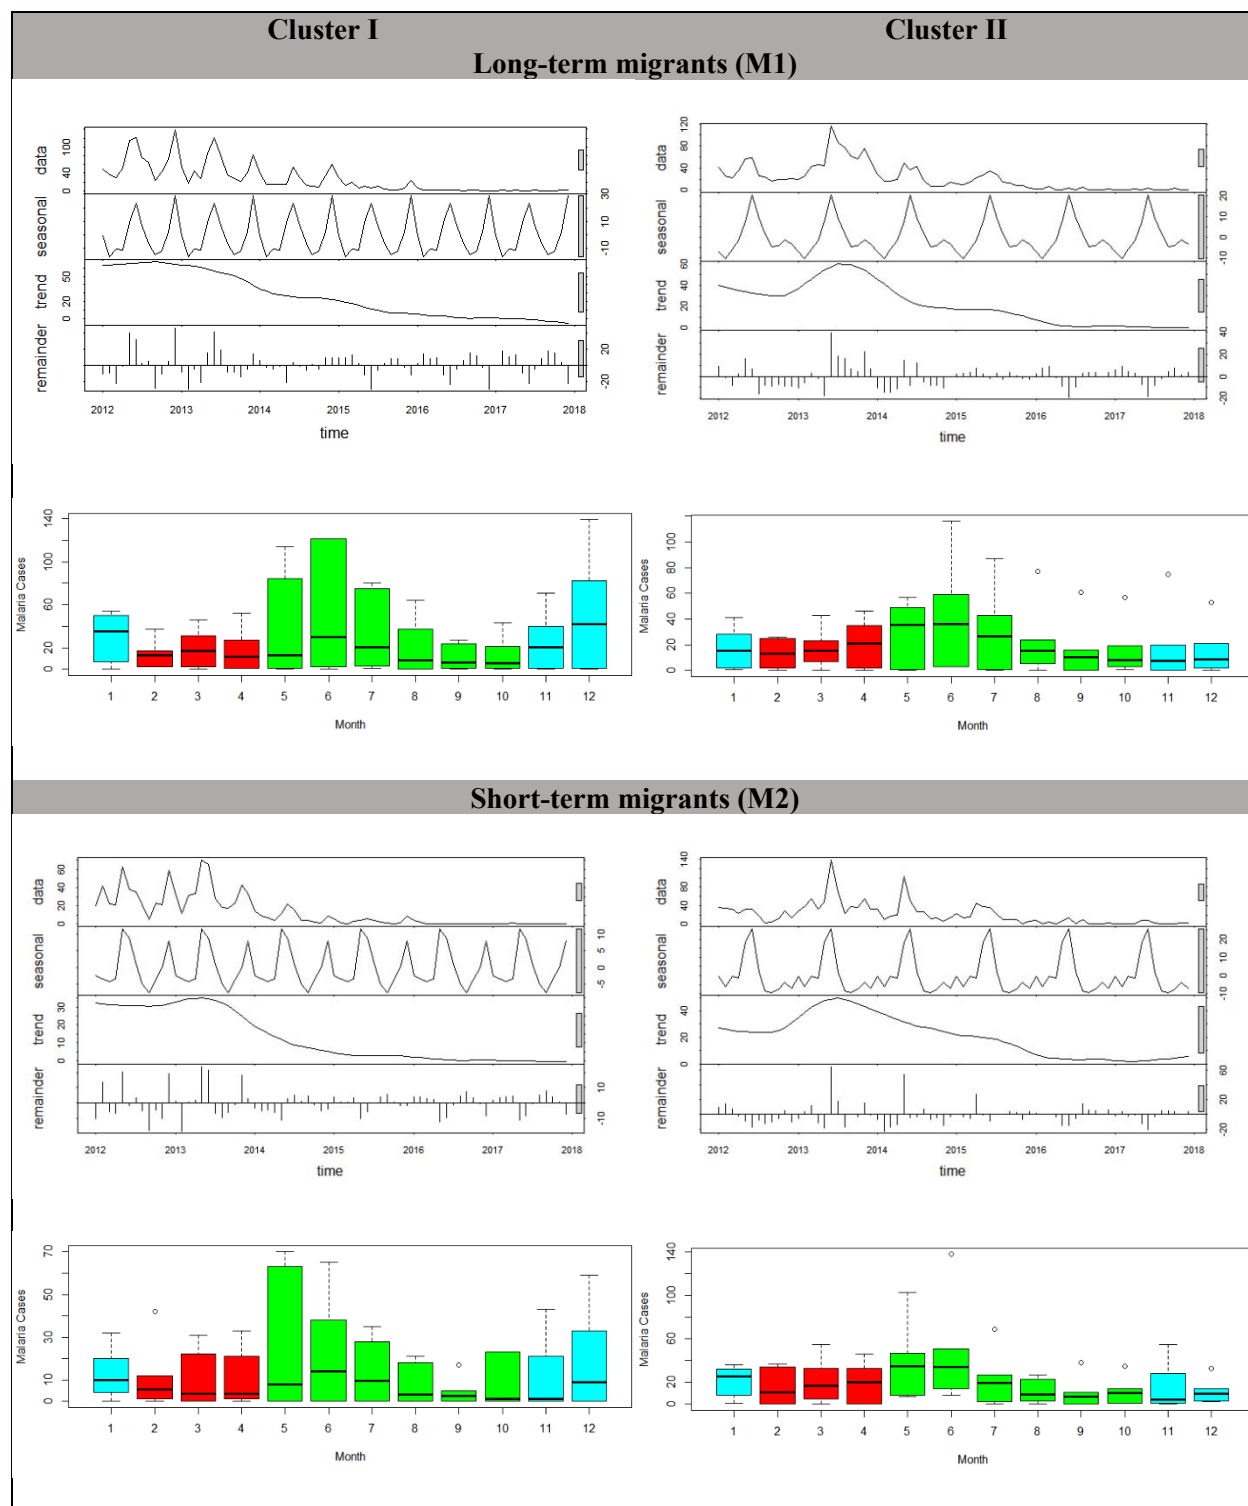

**Figure S2** STL and seasonal patterns of *P. falciparum* cases among M1 and M2 between 2012 and 2017 in Cluster I and Cluster II. Color of box plot; blue represents the cold season, red represents hot season, and green represents the rainy season.
