# Supplementary material for: Spatial Heterogeneity and Temporal Trends in Malaria on the Thai–Myanmar Border (2012–2017): A Retrospective Observational Study
Source: Trop Med Infect Dis. 2019 Apr 12;4(2):62. doi: 10.3390/tropicalmed4020062 (PMC6630951; doi:10.3390/tropicalmed4020062)
Supplement: Supplementary file 1 [file tropicalmed-04-00062-s001.zip]

Archive with 5 entries (5 files):
- Supplementary Figure S5.pdf
- Supplementary Figure S1 Tabel S1.pdf
- Supplementary Figure S2.pdf
- Supplementary Figure S3.pdf
- Supplementary Figure S4.pdf
