# Supplementary figures and images for: Spatial Heterogeneity and Temporal Trends in Malaria on the Thai–Myanmar Border (2012–2017): A Retrospective Observational Study
Source: MDPI journal article supplement (doi:10.3390/tropicalmed4020062), 2019-04-12

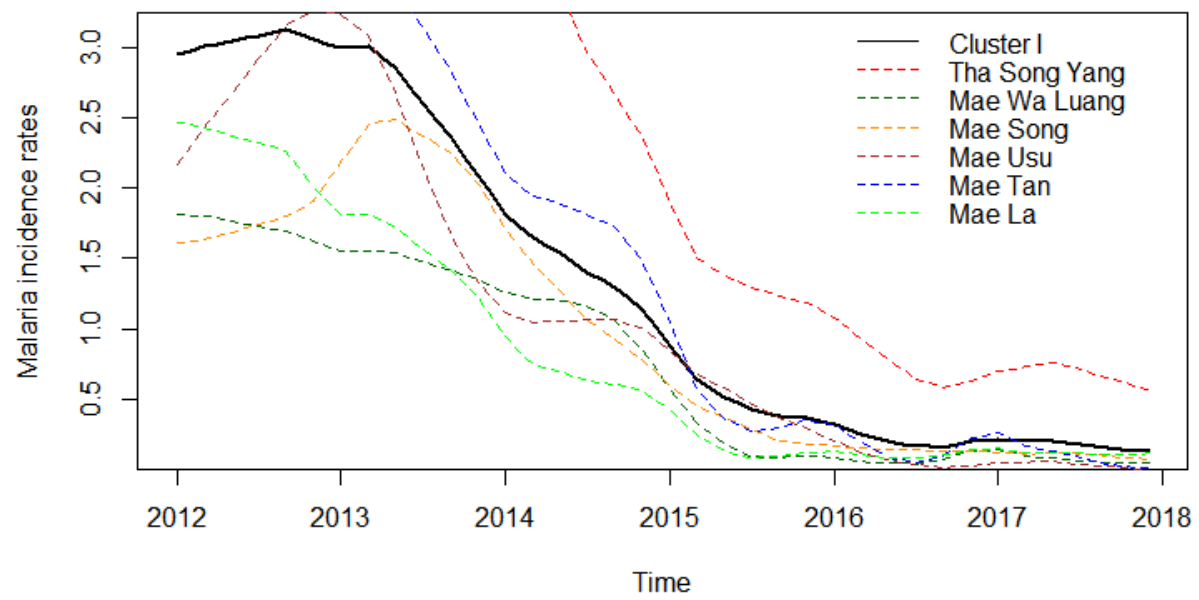

**Figure S4** Trend of *P. vivax* cases among Thai citizens between 2012 and 2017 in Cluster I (referred to **Figure 5 (c1)**)

Supplement: s1 [file s1]

*P. falciparum*

M1

M2

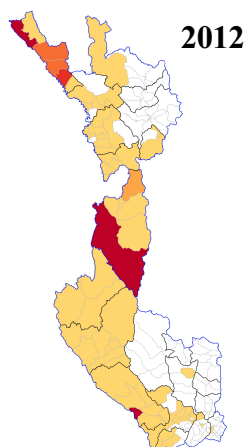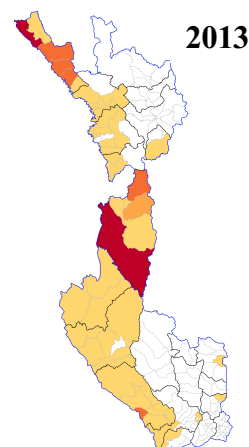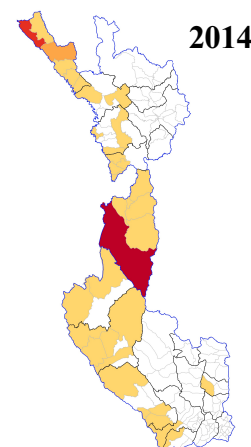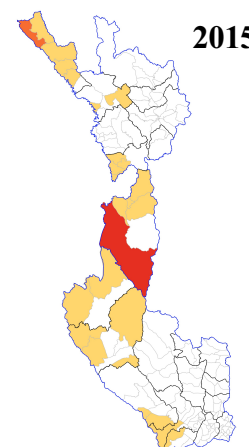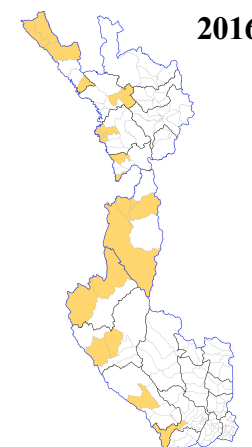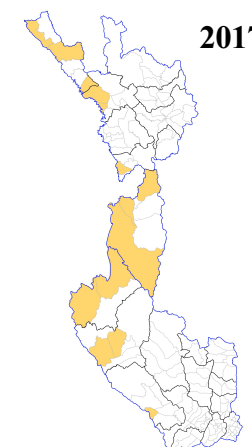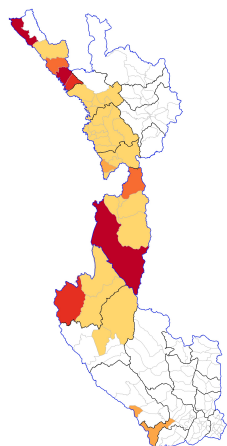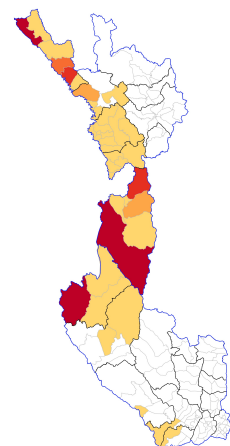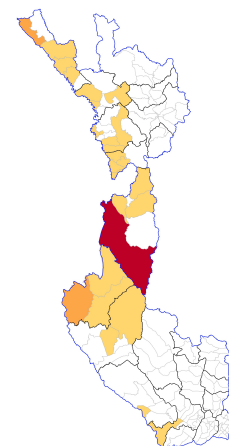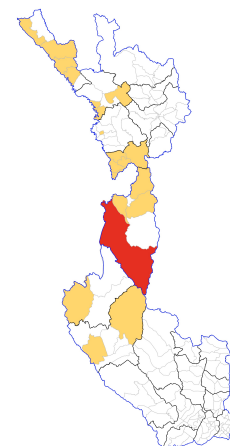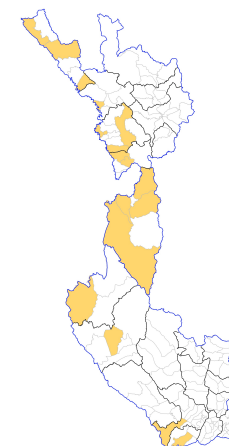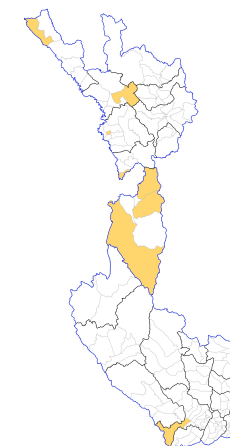

Number of cases

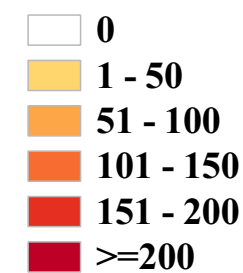

a

*P. vivax*

M1

M2

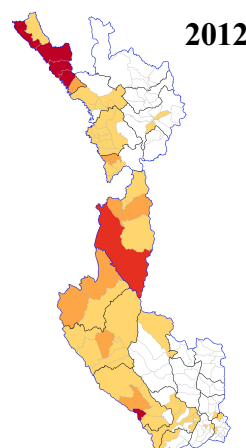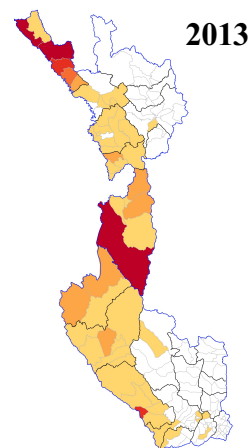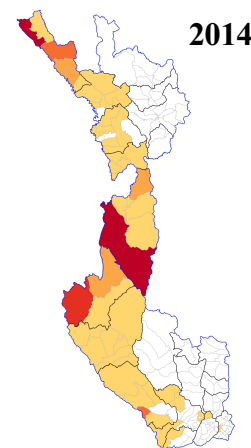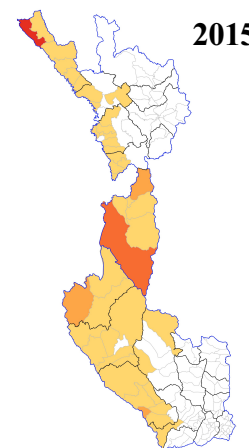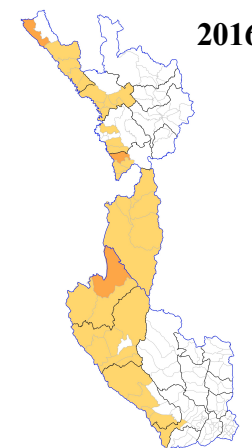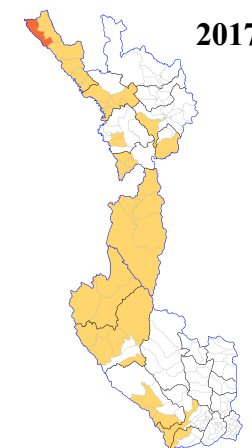

Number of cases

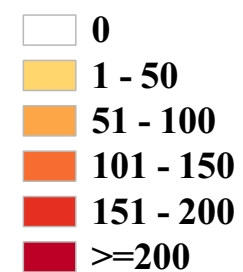

b

Supplement: s1 [file s1]
